# Supplementary material
Source: Springer Nature journal article supplement (https://www.springermedizin.de/resource/supplementary/12883_2009_397_MOESM2_ESM.pdf/9455062)
Supplement: MOESM2 [file 9455062]

4789 references retrieved from the literature databases

3803 references in the study database (duplicates removed)

221 potentially relevant reports retrieved for detailed evaluation

244 references included from conference searching and grey literature searching

465 potentially relevant reports retrieved for detailed evaluation

21 reports meeting inclusion criteria for data extraction

17 studies included (following linking of multiple publications per study)

3582 excluded at 1<sup>st</sup> screening stage

|                       |      |
|-----------------------|------|
| Language              | 192  |
| Review/Editorial      | 2264 |
| Disease               | 134  |
| Intervention          | 239  |
| Lidocaine formulation | 264  |
| Case study            | 269  |
| Animal/in vitro       | 183  |
| Study design          | 30   |
| Full text unavailable | 7    |

444 excluded at 2<sup>nd</sup> screening stage

|                       |     |
|-----------------------|-----|
| Copy/Duplicate        | 4   |
| Language              | 9   |
| Review/Editorial      | 63  |
| Disease               | 24  |
| Intervention          | 29  |
| Treatment naïve       | 233 |
| Lidocaine formulation | 40  |
| Case study            | 14  |
| Animal /in vitro      | 9   |
| Study design          | 3   |
| No subgroup analysis  | 5   |
| Full text unavailable | 9   |
| Children only         | 1   |
| Fibromyalgia only     | 1   |
